# Supplementary material for: Validation of the Arabic and French Versions of a Knowledge, Attitudes and Practices (KAP) Questionnaire on Tranquilizer Misuse
Source: MDPI journal article supplement (doi:10.3390/ijerph182111144), 2021-10-23
Supplement: s1 [file s1]

يُرجى الإجابة على الأسئلة التالية حول المهذئات (أدوية تتصمّن: المنوم أو حبوب الأعصاب، مثلاً: ألبرازولام، برومازيپام، ديازيبام، أمبين، زاناكس، فالسيوم، إلى آخره)؟

على مقياس من "0" (صفر) إلى "10" (عشر) نقاط، اختر رقم يعبر عن درجة موافقتك على العبارات التالية، بحيث أن الرقم "0" (صفر) يعني أنك ترفض كلياً والرقم "10" (عشرة) يعني أنك توافق تماماً  
يُرجى تقييم العبارات التالية بصرف النظر عما إذا كنت تستخدم المهذئات أم لا

مثلاً: ممارسة الرياضة تُفيد الصحة 0 1 2 3 4 5 6 7 8 9 10

← أوافق لا أوافق →

10 9 8 7 6 5 4 3 2 1 0

١ من الممكن أن أوافق على استعمال المهذئات لكي أنام بشكل أفضل

10 9 8 7 6 5 4 3 2 1 0

٢ إذا شعرت بتحسّن بعد بضعة أيام أتابع استعمال المهذئات حتى بعد إنتهاء فترة العلاج المقررة

10 9 8 7 6 5 4 3 2 1 0

٣ من الممكن أن أستعمل المهذئات لأستمتع أكثر مع عائلتي

10 9 8 7 6 5 4 3 2 1 0

٤ من الممكن أن أوافق على استعمال المهذئات إذا كنت محبط وحزين، لكي أعمل بشكل أفضل

10 9 8 7 6 5 4 3 2 1 0

٥ المهذئات تخفف من قدرة الناس على التحكم بتصرفاتهم

10 9 8 7 6 5 4 3 2 1 0

٦ الأشخاص الذين يتناولون المهذئات معرضين بشكل أكبر لخطر حدوث حوادث السير

10 9 8 7 6 5 4 3 2 1 0

٧ قد يكون للأدوية التي تؤثر على الأعصاب مثل المهذئات تأثير على قدرات الأطفال التعليمية عند وصفها لهم

10 9 8 7 6 5 4 3 2 1 0

٨ إذا شعرت بأثار جانبية خلال فترة العلاج بالمهذئات يجب أن أتوقف عن إستعماله في أقرب وقت ممكن

10 9 8 7 6 5 4 3 2 1 0

٩ أستعمل المهذئات حسب تعليمات الطبيب

10 9 8 7 6 5 4 3 2 1 0

١٠ إذا تم إستهلاك المهذئات بكثرة، فلن تنفع عند الحاجة إليها حقاً

10 9 8 7 6 5 4 3 2 1 0

١١ أفضل أن أبقى مهذئات إضافية في المنزل، في حال الحاجة إليها لاحقاً

10 9 8 7 6 5 4 3 2 1 0

١٢ أثق بقرار الطبيب سواء قرر وصف أو عدم وصف المهذئات

10 9 8 7 6 5 4 3 2 1 0

١٣ إذا كنت أعتقد أنني بحاجة إلى المهذئات ولم يصفها الطبيب، سأحصل عليها من الصيدلية بدون وصفة

10 9 8 7 6 5 4 3 2 1 0

١٤ غالباً ما يشرح الأطباء بوضوح للمريض أسباب وصف أو عدم وصف المهذئات

10 9 8 7 6 5 4 3 2 1 0

١٥ غالباً ما يشرح الأطباء بوضوح للمريض كيفية استخدام المهذئات

10 9 8 7 6 5 4 3 2 1 0

١٦ عند شراء المهذئات، يُبلغك الصيدلاني عن أهمية التقيد بالصحيح بالعلاج

١٧) في الشهر الماضي، هل إستعملت المهدّنات؟ ☐ نعم (رجاء إنتقل إلى السؤال ١٨) ☐ لا (رجاء إنتقل إلى السؤال ٢٨)

**أجب على الأسئلة التالية عن إستهلاكك من المهدّنات في الشهر الماضي**

١٨) كم كانت مدة آخر علاج بالمهدّنات؟

عدد الأيام:   عدد الأشهر:   عدد السنين:

١٩) من الذي وصف لك أو نصحك بإستخدام المهدّنات؟ (بإمكانك إختيار أكثر من إجابة)

☐ الطبيب ☐ الأصدقاء

☐ العائلة ☐ الصيّد/لاني

☐ كان عندي في المنزل

٢٠) في آخر مرة كان عليك أن تتناول المهدّنات، هل أكملت كل دورة العلاج؟

☐ نعم ☐ كلا

٢١) ماذا فعلت بالمهدّنات التي تركت دون إستعمال؟ (بإمكانك إختيار أكثر من إجابة)

☐ إحتفظت بها لكي أستعملها عندما أمرض في المرة القادمة

☐ رميتها في الزباله أو في مياه الصرف الصحي

☐ أعطيتها لأحد

☐ لم يتبقى لدي أي من المهدّنات

٢٢) في آخر مرة كان عليك أن تتناول المهدّنات، هل نسيت أن تأخذ أي من الجرعات؟

☐ أبداً (رجاء إنتقل إلى السؤال ٢٤)

☐ أحياناً (رجاء إنتقل إلى السؤال ٢٣)

☐ في كثير من الأحيان (رجاء إنتقل إلى السؤال ٢٣)

٢٣) ماذا فعلت عندما تخطيت/لم تتناول جرعة من المهدّنات؟

☐ تابعت الجرعات التالية بشكل طبيعي

☐ ضاعفت أو زدت الجرعة الثانية

☐ تناولتها عندما تذكرت

٢٤) في آخر مرة كان عليك أن تتناول المهدّنات، هل قمت بتغيير عيار الجرعة من تلقاء نفسك (بدون إستشارة طبيّة)؟

☐ أبداً (رجاء إنتقل إلى السؤال ٢٨)

☐ أحياناً (رجاء إنتقل إلى السؤال ٢٥)

☐ في كثير من الأحيان (رجاء إنتقل إلى السؤال ٢٥)

٢٥) ماذا فعلت عندما غيرت عيار جرعة المهدّنات من تلقاء نفسك (بدون إستشارة طبيّة)؟

☐ تناولت منها أكثر (رجاء إنتقل إلى السؤال ٢٦ ومن ثم إلى السؤال ٢٨)

☐ تناولت منها أقل (رجاء إنتقل إلى السؤال ٢٧)

☐ أحياناً تناولت منها أكثر وأحياناً أخرى أقل (رجاء أجب على السؤالين ٢٦ و ٢٧)

٢٦) لماذا قمت بزيادة عيار جرعة المهدّنات من تلقاء نفسك (بدون إستشارة طبيّة)؟ (بإمكانك إختيار أكثر من إجابة)

☐ نسيت أن أتناول الجرعة السابقة

☐ شعرت بأنني مريض جداً

☐ لم أشعر بتحسّن ملحوظ

☐ تحسّنت ولكن أردت أن أتحسّن أكثر

☐ كنتُ أمر بمرحلة عصبية (ضغوطات، مشاكل، إلى آخره)

٢٧) لماذا قمت بتخفيض عيار جرعة المهدّنات من تلقاء نفسك (بدون إستشارة طبيّة)؟ (بإمكانك إختيار أكثر من إجابة)

☐ كنتُ قلقاً من آثار الدواء الجانبية

☐ كنتُ متعباً ونسيت

☐ شعرت بأنني آخذ الكثير من الدواء

☐ كنتُ على عجلة ونسيت

☐ لا أحب تناول الأدوية في الليل

☐ شعرت بتحسّن

الخصائص الديموغرافية العامة

- (٢٨) حدد جنسك ☐ ذكر ☐ أنثى
- (٢٩) ما هو تاريخ ميلادك؟ (يرجى كتابة الأرقام المقابلة في الفراغات أدناه)
- □ □ □ □ □ □ □
- اليوم الشهر السنة
- (٣٠) ما هو أعلى مستوى تعليمي لديك؟
- ☐ لم أدخل إلى المدرسة
- ☐ ابتدائي (الصف الأول إلى الصف السادس)
- ☐ متوسط (الصف السابع إلى الصف التاسع)
- ☐ ثانوي (الصف العاشر إلى الصف الثاني عشر)
- ☐ جامعة
- (٣١) هل تعمل حالياً؟ ☐ نعم ☐ كلا
- (٣٢) ماذا يُعطى تأمينك الصحي؟ (بإمكانك إختيار أكثر من إجابة)
- ☐ ليس لدي تأمين صحي
- ☐ التكلفة أو جزء من تكلفة الإستشارة الطبية
- ☐ التكلفة أو جزء من تكلفة الأدوية
- (٣٣) يرجى الإشارة إلى وضعك العائلي؟
- ☐ متزوج/متزوجة (رجاء إنتقل إلى السؤال رقم ٣٤)
- ☐ مطلق/مطابقة (رجاء إنتقل إلى السؤال رقم ٣٦)
- ☐ أرمل/أرملة (رجاء إنتقل إلى السؤال رقم ٣٦)
- ☐ منفصل/منفصلة عن الزوجة/الزوج ولكن لستما مطلقين (رجاء إنتقل إلى السؤال رقم ٣٤)
- (٣٤) ما هو أعلى مستوى تعليمي لزوجك/لزوجتك؟
- ☐ لم يدخل/تدخل إلى المدرسة
- ☐ ابتدائي (الصف الأول إلى الصف السادس)
- ☐ متوسط (الصف السابع إلى الصف التاسع)
- ☐ ثانوي (الصف العاشر إلى الصف الثاني عشر)
- ☐ جامعة
- (٣٥) هل زوجك/زوجتك يعمل/تعمل حالياً؟ ☐ نعم ☐ كلا
- (٣٦) ما هو عدد الأفراد الذين يعيشون في منزلك، بما في ذلك أنت؟
- ☐ ٢ ☐ ٣-٤ ☐ ٥-٦ ☐ أكثر من ٦
- (٣٧) هل توجد أية مراكز رعاية صحية (مثلاً مستوصفات أو مستشفيات)، موجودة بالقرب من منطقة سكنك؟
- ☐ نعم ☐ كلا
- (٣٨) ما هو مجموع دخل الأسرة الشهري (مجموع الدخل المكتسب من جميع الأفراد الذين يعيشون في منزلك)؟
- ☐ أقل من ٥٠٠ دولار أمريكي في الشهر
- ☐ بين ٥٠٠ و ٩٩٩ دولار أمريكي في الشهر
- ☐ بين ١٠٠٠ و ١٤٩٩ دولار أمريكي في الشهر
- ☐ بين ١٥٠٠ و ١٩٩٩ دولار أمريكي في الشهر
- ☐ بين ٢٠٠٠ و ٢٥٠٠ دولار أمريكي في الشهر
- ☐ أكثر من ٢٥٠٠ دولار أمريكي في الشهر
- (٣٩) هل تستشير الطبيب عندما تكون مريضاً؟
- ☐ أبداً ☐ نادراً
- ☐ أحياناً ☐ دائماً (رجاء إنتقل إلى السؤال رقم ٤١)
- (٤٠) ما هو سبب عدم إستشارتك للطبيب بشكل دائم؟ (بإمكانك إختيار أكثر من إجابة)
- ☐ لا حاجة للطبيب
- ☐ الخوف من الطبيب
- ☐ عدم توفر المال الكافي
- ☐ عدم توفر الوقت الكافي لزيارة الطبيب
- ☐ فترة الإنتظار الطويلة ليتم فحص المريض من قبل الأطباء
- ☐ عدم وجود عيادة بالقرب من منزلي
- (٤١) هل سبق لك أن تَقَيَّمتَ وَصْفَةً طَبِّيةً عبر الهاتف؟
- ☐ نعم ☐ كلا
- (٤٢) هل تتناول الكحول أو المشروبات الروحية ؟
- ☐ نعم (رجاء إنتقل إلى السؤال رقم ٤٣)
- ☐ كلا (شكراً لك! لقد أكملت الإجابة على الإمتحان)
- (٤٣) كم مرة تشرب الكحول أو المشروبات الروحية؟
- ☐ في المناسبات الخاصة ☐ ٣ - ٥ مرات في الأسبوع
- ☐ مرة واحدة في الأسبوع ☐ يومياً
- ☐ في نهاية الأسبوع فقط

شكراً جزيلاً لوقتكم وتعاونكم!
