# Supplementary material for: Validation of the Arabic and French Versions of a Knowledge, Attitudes and Practices (KAP) Questionnaire on Tranquilizer Misuse
Source: MDPI journal article supplement (doi:10.3390/ijerph182111144), 2021-10-23
Supplement: s1 [file s1]

Veuillez répondre aux questions suivantes sur les **TRANQUILLISANTS** (*médicaments incluant somnifères ou calmants: Alprazolam, Bromazepam, Diazepam, Ambien, Xanax, Valium, etc.*)?

Sur une échelle de 0 à 10 points, sélectionnez un chiffre représentant votre niveau d'accord avec les affirmations ci-dessous. "0" (zéro) veut dire que vous n'êtes pas du tout d'accord et "10" représente un accord maximum.

Veuillez indiquer votre niveau d'accord **QUE VOUS** utilisez des *tranquillisants* **OU PAS**

Exemple: Faire du sport est bénéfique pour la santé (0) (1) (2) (3) (4) (5) (6) (7) (8) (9) (10)

- |                                                                                                                                                                          | ← Pas d'accord                               | D'accord → |
|--------------------------------------------------------------------------------------------------------------------------------------------------------------------------|----------------------------------------------|------------|
| 1. J'accepterais de prendre des <i>tranquillisants</i> pour mieux dormir                                                                                                 | (0) (1) (2) (3) (4) (5) (6) (7) (8) (9) (10) |            |
| 2. Si je me sens mieux après quelques jours, je continue parfois de prendre des <i>tranquillisants</i> même après avoir fini le traitement prescrit                      | (0) (1) (2) (3) (4) (5) (6) (7) (8) (9) (10) |            |
| 3. J'accepterais de prendre des <i>tranquillisants</i> pour pouvoir profiter du temps passé avec ma famille                                                              | (0) (1) (2) (3) (4) (5) (6) (7) (8) (9) (10) |            |
| 4. J'accepterais de prendre des <i>tranquillisants</i> quand je suis abattu(e) et triste pour pouvoir mieux travailler                                                   | (0) (1) (2) (3) (4) (5) (6) (7) (8) (9) (10) |            |
| 5. Les <i>tranquillisants</i> diminuent le contrôle des personnes sur ce qu'elles font                                                                                   | (0) (1) (2) (3) (4) (5) (6) (7) (8) (9) (10) |            |
| 6. Les personnes qui prennent des <i>tranquillisants</i> ont un plus grand risque d'avoir un accident de la route                                                        | (0) (1) (2) (3) (4) (5) (6) (7) (8) (9) (10) |            |
| 7. Lorsqu'ils sont prescrits à des enfants, les médicaments psychotropes (comme par exemple les <i>tranquillisants</i> ), peuvent affecter leur capacité d'apprentissage | (0) (1) (2) (3) (4) (5) (6) (7) (8) (9) (10) |            |
| 8. Si je ressens des effets secondaires durant un traitement de <i>tranquillisants</i> , je dois arrêter de prendre le médicament dès que possible                       | (0) (1) (2) (3) (4) (5) (6) (7) (8) (9) (10) |            |
| 9. Je prends les <i>tranquillisants</i> en suivant les instructions du médecin                                                                                           | (0) (1) (2) (3) (4) (5) (6) (7) (8) (9) (10) |            |
| 10. Quand les <i>tranquillisants</i> sont consommés de façon excessive, ils n'auront plus d'effet au moment où l'on en a vraiment besoin                                 | (0) (1) (2) (3) (4) (5) (6) (7) (8) (9) (10) |            |
| 11. Je préfère garder des <i>tranquillisants</i> chez moi au cas où j'en aurais besoin plus tard                                                                         | (0) (1) (2) (3) (4) (5) (6) (7) (8) (9) (10) |            |
| 12. Je fais confiance au médecin s'il /si elle décide de prescrire ou pas des <i>tranquillisants</i>                                                                     | (0) (1) (2) (3) (4) (5) (6) (7) (8) (9) (10) |            |
| 13. Si je pense que j'ai besoin d'un <i>tranquillant</i> et que le médecin ne me le prescrit pas, je vais à la pharmacie pour me le procurer sans ordonnance             | (0) (1) (2) (3) (4) (5) (6) (7) (8) (9) (10) |            |
| 14. Les médecins expliquent souvent clairement au patient les raisons de prescrire ou de ne pas prescrire des <i>tranquillisants</i>                                     | (0) (1) (2) (3) (4) (5) (6) (7) (8) (9) (10) |            |
| 15. Les médecins expliquent souvent clairement au patient les instructions d'utilisation des <i>tranquillisants</i>                                                      | (0) (1) (2) (3) (4) (5) (6) (7) (8) (9) (10) |            |
| 16. Quand le patient achète un <i>tranquillant</i> , le pharmacien lui explique l'importance d'une bonne adhésion thérapeutique                                          | (0) (1) (2) (3) (4) (5) (6) (7) (8) (9) (10) |            |

**17. Au cours du mois dernier, avez-vous pris des *tranquillisants*?**

- ☐ Oui (passer à la question 18) ☐ Non (passer à la question 28)

**Veuillez répondre aux questions suivantes sur votre consommation des TRANQUILLISANTS AU COURS DU MOIS DERNIER**

**18. Quelle a été la durée de votre dernier traitement aux *tranquillisants*?**

Nombre de jours

Nombre de mois

Nombre d'années

**19. Qui vous a prescrit ou recommandé les *tranquillisants*?** (Vous pouvez choisir plusieurs réponses)

- ☐ Le médecin ☐ Des amis
- ☐ La famille ☐ Le pharmacien
- ☐ Je les avais chez moi

**20. Avez-vous pris jusqu'au bout votre dernier traitement aux *tranquillisants*?**

- ☐ Oui ☐ Non

**21. Qu'avez-vous fait des *tranquillisants* que vous n'avez pas utilisés?** (Vous pouvez choisir plusieurs réponses)

- ☐ Je les ai gardés pour les utiliser la prochaine fois que je suis malade
- ☐ Je m'en suis débarrassé(e) dans la poubelle ou les eaux usées
- ☐ Je les ai donnés à quelqu'un d'autre
- ☐ Il ne me restait plus des *tranquillisants*

**22. Au cours de votre dernier traitement aux *tranquillisants*, vous est-il arrivé d'oublier de les prendre?**

- ☐ Jamais (passer à la question 24)
- ☐ Parfois (passer à la question 23)
- ☐ Souvent (passer à la question 23)

**23. Qu'avez-vous fait quand vous avez oublié de prendre une dose de vos *tranquillisants*?**

- ☐ J'ai continué de prendre les doses suivantes normalement
- ☐ J'ai doublé/augmenté la dose suivante
- ☐ Je l'ai prise dès que je m'en suis souvenu(e)

**24. Au cours de votre dernier traitement aux *tranquillisants*, avez-vous changé la dose sur votre propre décision (sans avis médical)?**

- ☐ Jamais (passer à la question 28)
- ☐ Parfois (passer à la question 25)
- ☐ Souvent (passer à la question 25)

**25. Comment avez-vous changé vous-même votre dose de *tranquillisants* (sans avis médical)?**

- ☐ J'en ai pris plus (passer à la question 26 puis à la question 28)
- ☐ J'en ai pris moins (passer à la question 27)
- ☐ Parfois j'en ai pris plus et parfois moins (passer à la question 26 puis 27)

**26. Pourquoi avez-vous vous-même décidé d'augmenter votre dose de *tranquillisants* (sans avis médical)?** (Vous pouvez choisir plusieurs réponses)

- ☐ J'ai oublié de prendre la dose précédente
- ☐ Je me suis senti(e) très malade
- ☐ Je n'ai pas senti de réelle amélioration
- ☐ J'ai senti une amélioration mais voulais me sentir encore mieux
- ☐ Je vivais une période stressante (stress, problèmes, etc...)

**27. Pourquoi avez-vous vous-même choisi de réduire votre dose de *tranquillisants* (sans avis médical)?** (vous pouvez choisir plusieurs réponses)

- ☐ J'avais peur des effets secondaires du médicament
- ☐ J'étais fatigué(e) et j'ai oublié
- ☐ J'ai pensé que j'en prenais trop
- ☐ J'étais pressé(e) et j'ai oublié
- ☐ Je n'aime pas prendre de médicaments la nuit
- ☐ Je me sentais mieux

Caractéristiques Démographiques Générales

28. Indiquez votre sexe ☐ Homme ☐ Femme

29. Quelle est votre date de naissance? (Veuillez inscrire les chiffres dans les espaces alloués)

|      |  |      |  |       |  |  |  |
|------|--|------|--|-------|--|--|--|
|      |  |      |  |       |  |  |  |
| Jour |  | Mois |  | Année |  |  |  |

30. Quel est votre niveau d'éducation académique.

- ☐ Je n'ai pas été à l'école
- ☐ Élémentaire/ Primaire (maternelle jusqu'à la 6<sup>ème</sup>)
- ☐ Complémentaire (5<sup>ème</sup> à la 3<sup>ème</sup>)
- ☐ Secondaire (2<sup>nde</sup> à la terminale)
- ☐ Universitaire

31. Actuellement, avez-vous une activité professionnelle?

- ☐ Oui ☐ Non

32. Qu'est-ce qui est couvert par votre assurance santé? (Vous pouvez choisir plus d'une réponse).

- ☐ Je n'ai pas d'assurance santé
- ☐ Le coût ou une partie des coûts des consultations médicales
- ☐ Le coût ou une partie des coûts de mes médicaments

33. Veuillez indiquer votre statut marital:

- ☐ Marié(e) (passer à la question 34)
- ☐ Divorcé(e) (passer à la question 36)
- ☐ Veuf/Veuve (passer à la question 36)
- ☐ Séparé(e) de mon épouse/époux, mais non divorcé(e) (passer à la question 34)

34. Quel est le niveau d'éducation académique de votre époux/épouse?

- ☐ Il/Elle n'a pas été à l'école
- ☐ Élémentaire/ Primaire (maternelle jusqu'à la 6<sup>ème</sup>)
- ☐ Complémentaire (5<sup>ème</sup> à la 3<sup>ème</sup>)
- ☐ Secondaire (2<sup>nde</sup> à la terminale)
- ☐ Universitaire

35. Actuellement, votre époux/épouse travaille-t-il/elle?

- ☐ Oui ☐ Non

36. Combien de personnes vivent sous votre toit, inclus vous-même?

- ☐ 2 ☐ 3-4 ☐ 5-6 ☐ Plus de 6

37. Y a-t-il des instituts de santé, tels que des dispensaires ou hôpitaux, situés près de votre lieu de résidence?

- ☐ Oui ☐ Non

38. Quel est le total des revenus familiaux (quel est le revenu total perçu par tous les membres de la famille vivant sous le même toit)?

- ☐ Moins de 500US\$ par mois
- ☐ Entre 500 et 999US\$ par mois
- ☐ Entre 1000 et 1499US\$ par mois
- ☐ Entre 1500 et 1999US\$ par mois
- ☐ Entre 2000 et 2500US\$ par mois
- ☐ Plus de 2500US\$ par mois

39. Consultez-vous un médecin lorsque vous êtes malade?

- ☐ Jamais ☐ Rarement
- ☐ Parfois ☐ Toujours (passer à la question 41)

40. Quelle est la raison pour laquelle vous ne consultez pas toujours un médecin? (Vous pouvez choisir plus d'une réponse).

- ☐ Je n'ai pas besoin de médecin
- ☐ J'ai peur des médecins
- ☐ Par manque d'argent
- ☐ Je n'ai pas le temps de le consulter
- ☐ L'attente avant d'être examiné(e) est longue
- ☐ La clinique est située loin de ma maison

41. Avez-vous déjà reçu une prescription médicale par téléphone?

- ☐ Oui ☐ Non

42. Buvez-vous de l'alcool?

- ☐ Oui (passer à la question 43)
- ☐ Non (Merci! Vous avez fini de répondre au questionnaire)

43. A quelle fréquence consommez-vous de l'alcool?

- ☐ Aux occasions spéciales
- ☐ Une fois par semaine
- ☐ Les weekends seulement
- ☐ 3 à 5 fois par semaine
- ☐ Tous les jours
